# Supplementary material
Source: publisher site journal article supplement (https://www.dovepress.com/article/488935)
Supplement: Supplementary file 1 [file get_supplementary_file.php]

**Table S1. Names of selected sixteen pathways.**

| Names |
| --- |
| GO CYCLOOXYGENASE PATHWAY |
| GO INTRA GOLGI VESICLE MEDIATED TRANSPORT |
| GO RETROGRADE VESICLE MEDIATED TRANSPORT GOLGI TO ENDOPLASMIC RETICULUM |
| GO POSITIVE REGULATION OF LIPOPOLYSACCHARIDE MEDIATED SIGNALING PATHWAY |
| GO GOLGI VESICLE TRANSPORT |
| GO PHAGOSOME MATURATION |
| GO OSSIFICATION INVOLVED IN BONE REMODELING |
| GO UBIQUITIN DEPENDENT ENDOCYTOSIS |
| GO SKELETAL MUSCLE SATELLITE CELL MAINTENANCE INVOLVED IN SKELETAL MUSCLE REGENERATION |
| GO DEOXYRIBOSE PHOSPHATE BIOSYNTHETIC PROCESS |
| GO ENDOPLASMIC RETICULUM TO GOLGI VESICLE MEDIATED TRANSPORT |
| GO NEGATIVE REGULATION OF GASTRULATION |
| GO LYSOSOMAL LUMEN ACIDIFICATION |
| GO REGULATION OF LYSOSOMAL LUMEN PH |
| GO DEOXYRIBONUCLEOSIDE MONOPHOSPHATE BIOSYNTHETIC PROCESS |
| GO DEOXYRIBONUCLEOSIDE MONOPHOSPHATE METABOLIC PROCESS |

**Table S2. The expression of six genes in normal and OA samples.**

| Type | Normal | OA |
| --- | --- | --- |
| LY86 | 8.15±0.754 | 9.08±0.665 |
| SORL1 | 7.85±0.867 | 8.71±0.723 |
| KDELR3 | 7.89±0.564 | 9.1±0.487 |
| CSK | 7.98±0.592 | 8.59±0.55 |
| PTGS1 | 7.62±0.595 | 8.49±0.564 |
| PTGS2 | 6.19±1.51 | 5.17±1.43 |
